# Supplementary material
Source: HighWire-hosted journal article supplement (http://cmajopen.ca/highwire/filestream/85265/field_highwire_adjunct_files/2/2020-0157-original-submission.pdf)
Supplement: 2020-0157-original-submission.pdf [file 2020-0157-original-submission.pdf]

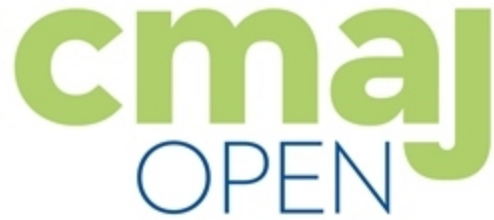

**Long-Term Macrolide Therapy for Chronic Obstructive  
Pulmonary Disease: A Population-Based Study**

|                               |                                                                                                                                                                                                                                                                                                                                                                                                                                                                                                                                                                                                                                                                                                                                                                                                                                                                                                                                                                                                                                                                                                                                                                                                                                                                                                                                                                                                                                                                                     |
|-------------------------------|-------------------------------------------------------------------------------------------------------------------------------------------------------------------------------------------------------------------------------------------------------------------------------------------------------------------------------------------------------------------------------------------------------------------------------------------------------------------------------------------------------------------------------------------------------------------------------------------------------------------------------------------------------------------------------------------------------------------------------------------------------------------------------------------------------------------------------------------------------------------------------------------------------------------------------------------------------------------------------------------------------------------------------------------------------------------------------------------------------------------------------------------------------------------------------------------------------------------------------------------------------------------------------------------------------------------------------------------------------------------------------------------------------------------------------------------------------------------------------------|
| Journal:                      | <i>CMAJ Open</i>                                                                                                                                                                                                                                                                                                                                                                                                                                                                                                                                                                                                                                                                                                                                                                                                                                                                                                                                                                                                                                                                                                                                                                                                                                                                                                                                                                                                                                                                    |
| Manuscript ID                 | CMAJOpen-2020-0157                                                                                                                                                                                                                                                                                                                                                                                                                                                                                                                                                                                                                                                                                                                                                                                                                                                                                                                                                                                                                                                                                                                                                                                                                                                                                                                                                                                                                                                                  |
| Manuscript Type:              | Descriptive                                                                                                                                                                                                                                                                                                                                                                                                                                                                                                                                                                                                                                                                                                                                                                                                                                                                                                                                                                                                                                                                                                                                                                                                                                                                                                                                                                                                                                                                         |
| Date Submitted by the Author: | 01-Jul-2020                                                                                                                                                                                                                                                                                                                                                                                                                                                                                                                                                                                                                                                                                                                                                                                                                                                                                                                                                                                                                                                                                                                                                                                                                                                                                                                                                                                                                                                                         |
| Complete List of Authors:     | <p>Yan, Marie; University of Toronto, Department of Medicine; The University of British Columbia, Department of Medicine</p> <p>Saxena, Farah; Institute for Clinical Evaluative Sciences, calzavara, andrew; Institute for Clinical Evaluative Sciences</p> <p>Brown, Kevin; Public Health Ontario, Infection Prevention and Control; Institute for Clinical Evaluative Sciences; University of Toronto Dalla Lana School of Public Health</p> <p>Garber, Gary; Public Health Ontario, Infection Prevention and Control; Ottawa Hospital Research Institute; University of Toronto, Department of Medicine</p> <p>Gershon, Andrea; Institute for Clinical Evaluative Sciences; Sunnybrook Health Sciences Centre; University of Toronto, Department of Medicine</p> <p>Johnstone, Jennie; Public Health Ontario, Infection Prevention and Control; University of Toronto Dalla Lana School of Public Health; Sinai Health System</p> <p>Kumar, Matthew; Institute for Clinical Evaluative Sciences, DAS</p> <p>Langford, Bradley; Public Health Ontario, Infection Prevention and Control</p> <p>Schwartz, Kevin; Public Health Ontario; Institute for Clinical Evaluative Sciences; University of Toronto Dalla Lana School of Public Health; Unity Health Toronto</p> <p>Daneman, Nick; Sunnybrook Health Sciences Centre, University of Toronto, Medicine; Institute for Clinical Evaluative Sciences; University of Toronto, Department of Medicine; Public Health Ontario</p> |
| Keywords:                     | Respiratory medicine (respirology), Drugs and therapeutics                                                                                                                                                                                                                                                                                                                                                                                                                                                                                                                                                                                                                                                                                                                                                                                                                                                                                                                                                                                                                                                                                                                                                                                                                                                                                                                                                                                                                          |
| More Detailed Keywords:       | COPD, Macrolides, Azithromycin                                                                                                                                                                                                                                                                                                                                                                                                                                                                                                                                                                                                                                                                                                                                                                                                                                                                                                                                                                                                                                                                                                                                                                                                                                                                                                                                                                                                                                                      |
| Abstract:                     | <p>Background: Macrolides are recommended as an adjunctive treatment for patients with moderate to severe chronic obstructive pulmonary disease (COPD) who experience recurrent exacerbations. However, the prevalence and impact of this practice at the population level is not known. The objective of this study is to examine temporal trends in the provision of long-term macrolide therapy and associated clinical outcomes.</p>                                                                                                                                                                                                                                                                                                                                                                                                                                                                                                                                                                                                                                                                                                                                                                                                                                                                                                                                                                                                                                            |

1  
2  
3  
4  
5  
6  
7  
8  
9  
10  
11  
12  
13  
14  
15  
16  
17  
18  
19  
20  
21  
22  
23  
24  
25  
26  
27  
28  
29  
30  
31  
32  
33  
34  
35  
36  
37  
38  
39  
40  
41  
42  
43  
44  
45  
46  
47  
48  
49  
50  
51  
52  
53  
54  
55  
56  
57  
58  
59  
60

|  |                                                                                                                                                                                                                                                                                                                                                                                                                                                                                                                                                                                                                                                                                                                                                                                                                                                                                                                                                                                                                                                                                                                                                                                                                                                                                              |
|--|----------------------------------------------------------------------------------------------------------------------------------------------------------------------------------------------------------------------------------------------------------------------------------------------------------------------------------------------------------------------------------------------------------------------------------------------------------------------------------------------------------------------------------------------------------------------------------------------------------------------------------------------------------------------------------------------------------------------------------------------------------------------------------------------------------------------------------------------------------------------------------------------------------------------------------------------------------------------------------------------------------------------------------------------------------------------------------------------------------------------------------------------------------------------------------------------------------------------------------------------------------------------------------------------|
|  | <p>Methods: We performed an interrupted time series analysis using population-level health administrative data. The study cohort consisted of all Ontario residents with COPD, aged 65 years or older between April 1, 2004 and March 31, 2018.</p> <p>Results: The rate of chronic macrolide use increased from 0.8/1000 persons in 2004 to 13.8/1000 persons in 2018 (in the severe COPD group, the rate increased from 1.3 to 32.3/1000 persons). The interrupted time series analysis showed that before 2011, the prevalence of macrolide prophylaxis increased at a rate of 0.44/1000 persons per year (95% confidence interval [CI] 0.39–0.50); after 2011, the rate of increase grew by 1.18/1000 persons (95% CI 1.07–1.29) to 1.63/1000 persons per year (95% CI 1.56–1.69). The seasonal pattern of COPD-related healthcare visits remained stable over the study period and there was no appreciable reduction in hospitalizations/emergency department visits.</p> <p>Interpretation: In the past decade, there has been a significant rise in the use of long-term macrolide therapy for patients with COPD. However, the overall rate remains low, and thus there has not been a detectable impact on the trend of COPD-related healthcare encounters in this population.</p> |
|  |                                                                                                                                                                                                                                                                                                                                                                                                                                                                                                                                                                                                                                                                                                                                                                                                                                                                                                                                                                                                                                                                                                                                                                                                                                                                                              |

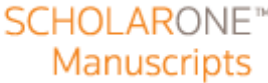

1  
2  
3 **Long-Term Macrolide Therapy for Chronic Obstructive Pulmonary Disease: A**  
4  
5 **Population-Based Study**  
6  
7  
8  
9

10 Marie Yan, MD<sup>1,2</sup>, Farah E. Saxena, MSc<sup>3</sup>, Andrew Calzavara, MSc<sup>3</sup>, Kevin A. Brown, PhD<sup>3,4,5</sup>,  
11  
12 Gary Garber, MD<sup>1,5,6</sup>, Andrea S. Gershon, MD MSc<sup>1,3,7</sup>, Jennie Johnstone, MD PhD<sup>4,5,8</sup>,  
13  
14 Matthew Kumar, MSc<sup>3</sup>, Bradley J. Langford, PharmD<sup>5</sup>, Kevin L. Schwartz, MD MSc<sup>3,4,5,9</sup>, and  
15  
16 Nick Daneman, MD MSc<sup>1,3,5,7</sup>  
17  
18  
19  
20

21 <sup>1</sup>Department of Medicine, University of Toronto, Toronto, Ontario, Canada  
22

23 <sup>2</sup>Department of Medicine, University of British Columbia, Vancouver, British Columbia, Canada  
24

25 <sup>3</sup>ICES, Toronto, Ontario, Canada  
26

27 <sup>4</sup>Dalla Lana School of Public Health, University of Toronto, Toronto, Ontario, Canada  
28

29 <sup>5</sup>Public Health Ontario, Toronto, Ontario, Canada  
30

31 <sup>6</sup>Ottawa Hospital Research Institute, Ottawa, Ontario, Canada  
32

33 <sup>7</sup>Sunnybrook Health Sciences Centre, Toronto, Ontario, Canada  
34

35 <sup>8</sup>Sinai Health System, Toronto, Ontario, Canada  
36

37 <sup>9</sup>Unity Health Toronto, Toronto, Ontario, Canada  
38  
39  
40  
41  
42  
43

44 Corresponding Author:  
45

46 Dr. Nick Daneman  
47

48 Sunnybrook Health Sciences Centre  
49

50 2075 Bayview Avenue  
51

52 Toronto, Ontario M4N 3M5  
53  
54  
55  
56  
57  
58  
59  
60

1  
2  
3 Canada

4  
5 Email: [nick.daneman@sunnybrook.ca](mailto:nick.daneman@sunnybrook.ca)  
6  
7  
8  
9

10 Author Contributions:

11  
12 N.D., M.Y., F.E.S., A.C., K.A.B., G.G., A.S.G., J.J., B.J.L., and K.L.S. contributed to the study  
13  
14 conception and design; M.Y., F.E.S., A.C., and N.D. contributed to coding and data acquisition;  
15  
16 A.C. performed the statistical analysis; N.D., M.Y., and A.C. interpreted the results; M.Y. and  
17  
18 F.E.S. drafted the manuscript and all authors contributed to the final draft.  
19  
20  
21  
22  
23

24 Funding Statement: This study was funded by a grant from the Canadian Institutes of Health  
25  
26 Research.  
27  
28  
29  
30

31 Data-Sharing Statement: Please send inquiries to the corresponding author.  
32  
33  
34

35 Total Word Count: 2495 words  
36  
37  
38  
39  
40  
41  
42  
43  
44  
45  
46  
47  
48  
49  
50  
51  
52  
53  
54  
55  
56  
57  
58  
59  
60

## ABSTRACT

Background: Macrolides are recommended as an adjunctive treatment for patients with moderate to severe chronic obstructive pulmonary disease (COPD) who experience recurrent exacerbations. However, the prevalence and impact of this practice at the population level is not known. The objective of this study is to examine temporal trends in the provision of long-term macrolide therapy and associated clinical outcomes.

Methods: We performed an interrupted time series analysis using population-level health administrative data. The study cohort consisted of all Ontario residents with COPD, aged 65 years or older between April 1, 2004 and March 31, 2018.

Results: The rate of chronic macrolide use increased from 0.8/1000 persons in 2004 to 13.8/1000 persons in 2018 (in the severe COPD group, the rate increased from 1.3 to 32.3/1000 persons).

The interrupted time series analysis showed that before 2011, the prevalence of macrolide prophylaxis increased at a rate of 0.44/1000 persons per year (95% confidence interval [CI] 0.39–0.50); after 2011, the rate of increase grew by 1.18/1000 persons (95% CI 1.07–1.29) to 1.63/1000 persons per year (95% CI 1.56–1.69). The seasonal pattern of COPD-related healthcare visits remained stable over the study period and there was no appreciable reduction in hospitalizations/emergency department visits.

Interpretation: In the past decade, there has been a significant rise in the use of long-term macrolide therapy for patients with COPD. However, the overall rate remains low, and thus there

1  
2  
3  
4  
5  
6  
7  
8  
9  
10  
11  
12  
13  
14  
15  
16  
17  
18  
19  
20  
21  
22  
23  
24  
25  
26  
27  
28  
29  
30  
31  
32  
33  
34  
35  
36  
37  
38  
39  
40  
41  
42  
43  
44  
45  
46  
47  
48  
49  
50  
51  
52  
53  
54  
55  
56  
57  
58  
59  
60

has not been a detectable impact on the trend of COPD-related healthcare encounters in this population.

Abstract Word Count: 248 words

Confidential

## INTRODUCTION

Chronic obstructive pulmonary disease (COPD) is one of the most common respiratory conditions worldwide.<sup>1-3</sup> One of the priorities of COPD management is preventing acute exacerbations, which are associated with increased mortality, accelerated disease progression, and reduced quality of life. In addition, COPD exacerbations contribute significantly to the economic burden associated with the disease.<sup>4,5</sup>

Although inhaled therapies are the mainstay of COPD treatment, many patients continue to experience exacerbations despite intensive inhaler regimens, and adjunctive therapies are required. In 2011, a seminal randomized controlled trial (RCT) by Albert et al. was published in the *New England Journal of Medicine*, reporting a decrease in the frequency of exacerbations when oral azithromycin (versus placebo) was added to usual care (MACRO trial).<sup>6</sup> The benefits of macrolide prophylaxis for prevention of exacerbations have subsequently been corroborated by other studies and systematic reviews.<sup>7-10</sup> The mechanism is thought to be related to macrolides' anti-inflammatory and immunomodulatory properties, in addition to their antibacterial action.<sup>6,11,12</sup>

Current guidelines suggest that chronic macrolide use should be considered for patients with moderate to severe COPD and recurrent exacerbations.<sup>13,14</sup> However, the prevalence of patients who receive prophylaxis is not known, and the impact of this practice on exacerbation rates and potential adverse events in the real-world setting has also not been studied. In this population-level study, we examined the trends in the provision of macrolide prophylaxis for COPD patients over time to determine whether publication of the landmark RCT was associated with increased

1  
2  
3 use of this intervention across the spectrum of COPD severity, and whether this was associated  
4  
5 with changes in clinical outcomes.  
6  
7  
8  
9  
10

## 11 METHODS

### 12 Data Sources

13  
14  
15 This study was performed at ICES (formerly known as the Institute for Clinical Evaluative  
16  
17 Sciences) using health administrative data from the province of Ontario, Canada.<sup>15–17</sup> Details  
18  
19 about the specific databases used can be found in the Appendix. All datasets were linked at the  
20  
21 individual level using unique encoded identifiers and analyzed at ICES. Residents with COPD  
22  
23 were identified using the ICES-derived COPD database, which has a sensitivity of 85% and  
24  
25 specificity of 78% for identifying COPD patients (in our study the specificity should be  
26  
27 increased since all included patients were required to be on at least one long-acting inhaler).<sup>18</sup>  
28  
29 ICES-derived chronic disease cohorts that have been previously developed and validated using  
30  
31 administrative databases were used to identify baseline comorbid conditions, such as asthma and  
32  
33 congestive heart failure.<sup>19,20</sup>  
34  
35  
36  
37  
38  
39  
40  
41

### 42 Patient Selection Criteria

43  
44 Our study cohort consisted of Ontario residents with COPD, aged 65 years or older between  
45  
46 April 1, 2004 and March 31, 2018. To be eligible for the study, each patient must be receiving at  
47  
48 least one long-acting inhaler available through Ontario Drug Benefit, such as a long-acting  
49  
50 muscarinic antagonist (LAMA), long-acting beta agonist (LABA), inhaled corticosteroid (ICS),  
51  
52 or a combination thereof. The study period was divided into quarter-years (three-month  
53  
54  
55  
56  
57  
58  
59  
60



1  
2  
3 intervals). A patient could be included in multiple quarters, as long as they met eligibility criteria  
4  
5 on or before the first day of the quarter. We excluded patients with a history of bronchiectasis  
6  
7 and/or nontuberculous mycobacterial infection, since these are also indications for prolonged  
8  
9 macrolide treatment. These patients were identified using the International Classification of  
10  
11 Diseases Tenth Revision (ICD-10) and Ontario Health Insurance Plan diagnosis codes, as well as  
12  
13 previous prescriptions for rifampin and/or ethambutol.  
14  
15  
16  
17  
18

### 19 Baseline Characteristics

20  
21 Baseline variables of interest included demographics, comorbidities, medication use, and  
22  
23 healthcare utilization. We compared the baseline characteristics of eligible COPD patients before  
24  
25 and after the MACRO study was published in August 2011 (designated as pre-Q3-2011 and post-  
26  
27 Q3-2011)<sup>6</sup>; for the purposes of these comparisons, we randomly selected one eligible quarter per  
28  
29 person in each time period.  
30  
31  
32  
33  
34

### 35 Outcomes

36  
37 Our primary outcome was the overall prevalence of chronic macrolide therapy amongst all  
38  
39 patients with COPD in Ontario. This was calculated as the number (per 1000) of COPD patients  
40  
41 who were receiving chronic macrolide prophylaxis overlapping the quarter, which was defined  
42  
43 as having an active prescription for azithromycin, clarithromycin, or erythromycin for  $\geq 90$   
44  
45 consecutive days. To account for possible delays in dispensing refills, we allowed any number of  
46  
47 gaps between prescriptions, provided that each gap was no longer than 14 days.  
48  
49  
50  
51  
52  
53  
54  
55  
56  
57  
58  
59  
60

1  
2  
3 For secondary outcomes, we measured the potential benefits of macrolide prophylaxis via the  
4 incidence of COPD-related hospitalizations, ED visits, and outpatient exacerbations requiring  
5 high-dose steroids (receipt of an oral corticosteroid within seven days of an outpatient visit for  
6 COPD) in each quarter. We captured the potential harms of macrolide prophylaxis via the  
7 incidence of hospitalization or ED visits due to any one of the following: arrhythmias potentially  
8 related to macrolide-induced QT prolongation including cardiac death, hearing impairment,  
9 general adverse medication events and drug allergy, antibiotic-resistant organisms,  
10 *Clostridioides difficile* colitis and non-infectious diarrhea, or candidiasis (ICD-10 codes listed in  
11 Appendix Table S1). For all outcomes, the denominator of at-risk individuals included all COPD  
12 patients meeting inclusion/exclusion criteria at the start of the quarter.  
13  
14  
15  
16  
17  
18  
19  
20  
21  
22  
23  
24  
25  
26  
27

28 We examined for potential indication creep by stratifying by COPD severity and comparing the  
29 proportion of mild, moderate, and severe COPD patients who received macrolide prophylaxis.  
30 COPD severity was defined in two ways: 1) therapy-based severity and 2) exacerbation-based  
31 severity. We defined therapy-based severity by the number of classes of long-acting inhaler  
32 treatments in the preceding two years: one inhaler class (mild), two inhaler classes (moderate), or  
33 three inhalers classes and/or supplemental oxygen (severe). Exacerbation-based severity was  
34 defined using COPD-related hospital encounters in the preceding two years: an inpatient  
35 hospitalization (severe), an ED visit (moderate), or neither (mild). After assigning patients to  
36 responsible physicians (based on who prescribed their chronic inhaler therapy), we examined  
37 physician variability in the percentage of their COPD patients for whom they prescribed  
38 macrolides in the most recent study year (fiscal year 2017).  
39  
40  
41  
42  
43  
44  
45  
46  
47  
48  
49  
50  
51  
52  
53  
54  
55  
56  
57  
58  
59  
60

## Statistical Analysis

We examined temporal trends in the incidence of macrolide prophylaxis over time (per 1000 persons) between April 1, 2004 and March 31, 2018 (14 years, 56 quarters). The unit of analysis was the quarter. To test the specificity of our findings, we also examined temporal trends in other common antimicrobial agents that have not been endorsed for chronic prophylaxis in this population, namely cephalexin and nitrofurantoin. We performed an interrupted time series analysis to assess for changes in the incidence of macrolide prophylaxis, using a linear model with two parameters in addition to the intercept: the pre-period slope and the post-period slope change.<sup>21</sup> Statistical analyses were performed using SAS version 9.4m5 (2017, SAS Institute Inc., Cary, NC).

## Ethics Approval

The use of data in this project was authorized under section 45 of Ontario's *Personal Health Information Protection Act*, which does not require review by a Research Ethics Board.

## RESULTS

### Baseline Characteristics

There were 919,008 Ontarians aged 65 or older with COPD between April 1, 2004 and March 31, 2018. We excluded 472,480 individuals who were not receiving a long-acting inhaler and 12,402 with a history of bronchiectasis and/or mycobacterial infection, resulting in 434,126 eligible subjects for our study (Appendix Figure S1). There were 254,457 patients eligible pre-

1  
2  
3 Q3-2011 and 312,370 patients eligible post-Q3-2011. COPD patient characteristics were similar  
4  
5 in the pre-Q3-2011 and post-Q3-2011 periods (Table 1).  
6  
7  
8  
9

### 10 Prevalence of Macrolide Prophylaxis

11  
12 The prevalence of macrolide prophylaxis increased during the study period from 0.8 per 1000  
13  
14 persons in 2004-Q2 to a high of 13.8 per 1000 persons by the end of the follow-up period. In  
15  
16 contrast, the prevalence of cephalexin and nitrofurantoin chronic prophylaxis were generally  
17  
18 stable throughout the study period (Figure 1). When stratified by therapy-based COPD severity,  
19  
20 patients in the severe group exhibited a steep increase in the prevalence of macrolide prophylaxis  
21  
22 over time (from 1.3 to 32.3 per 1000). Those with mild and moderate severity exhibited less  
23  
24 pronounced increases in prevalence over the study period (Figure 2A). When stratified by  
25  
26 exacerbation-based severity, both the moderate and severe groups exhibited similarly large  
27  
28 increases in prevalence over time (Figure 2B). The interrupted time series model showed that  
29  
30 macrolide prophylaxis increased by 0.44 (95% CI 0.39 – 0.50) per 1000 persons each year before  
31  
32 the RCT publication in August 2011, and thereafter increased by 1.18 per 1000 (95% CI 1.07 –  
33  
34 1.29) to a rate of 1.63 (95% CI 1.56 – 1.69) per 1000 persons per year (Figure 3).  
35  
36  
37  
38  
39  
40  
41

42 Over 80% of macrolide prophylaxis regimens used azithromycin. The most common regimen  
43  
44 was equivalent to a daily dose of <150 mg of azithromycin (35.7% of regimens), followed by  
45  
46 250–499 mg of azithromycin (30.8%), and 150–249 mg of azithromycin (13.7%). Physicians  
47  
48 who prescribed chronic macrolides had a median of 4.5% of their COPD patients on prophylaxis,  
49  
50 with wide variability across prescribers (interquartile range (IQR): 2.1% - 10.0%). Median use  
51  
52  
53  
54  
55  
56  
57  
58  
59  
60

1  
2  
3 and variability across prescribers were higher among patients with severe COPD (by therapy-  
4 based criterion, median 8.3% (IQR: 1.5% - 18.7%).  
5  
6  
7  
8  
9

### 10 Temporal Trends in Clinical Outcomes

11  
12 There was a strong seasonality in COPD-related outcomes, but no observable change in  
13 frequency or slope after Q3-2011 (Figure 4). Among the most severe stratum of COPD patients  
14 by therapy-based definition, for which macrolide prophylaxis was more common, there was also  
15 no detectable change in outcomes after Q3-2011 (Figure 5). Similar results were seen for those  
16 with severe COPD defined by exacerbations (data not shown).  
17  
18  
19  
20  
21  
22  
23  
24  
25  
26  
27

### 28 INTERPRETATION

29  
30 In this population-level study involving COPD patients over age 65 in Ontario, Canada, we  
31 found that there has been a significant and steady rise in the use of macrolide prophylaxis in the  
32 past decade. This effect is primarily attributed to the landmark paper published in August 2011  
33 demonstrating the efficacy of macrolides in reducing exacerbations and the subsequent inclusion  
34 of this practice into major clinical guidelines.<sup>6</sup> To our knowledge, this is the first study to  
35 demonstrate the prevalence of macrolide prophylaxis at a population level. Previously, one study  
36 using the United Kingdom primary care database between 2000 and 2009 had reported that only  
37 0.61% of COPD patients received antibiotic prophylaxis (most frequently with non-macrolide  
38 antibiotics), however, this study was conducted prior to the 2011 RCT publication, and before  
39 the practice was widely incorporated into clinical guidelines.<sup>23</sup>  
40  
41  
42  
43  
44  
45  
46  
47  
48  
49  
50  
51  
52  
53  
54  
55  
56  
57  
58  
59  
60

1  
2  
3 Most of the trials involving macrolide prophylaxis focused on patients with moderate to severe  
4 COPD, and this is reflected in all the major clinical guidelines. Specifically, the latest joint  
5 statement from the American Thoracic Society and the European Respiratory Society in 2017  
6 suggests macrolides for patients with “moderate to very severe airflow obstruction and  
7 exacerbations despite optimal inhaled therapy”.<sup>14</sup> Similar recommendations have been published  
8 by the Canadian Thoracic Society and American College of Chest Physicians.<sup>13,24</sup> To examine  
9 for indication creep, we stratified the patients by severity based on their long-acting inhaler  
10 medications and exacerbation rates in the preceding two years. Our results showed that, in  
11 general, physicians are prescribing in accordance with these guidelines. Patients who received  
12 macrolides are overwhelmingly those who continue to have exacerbations despite being on triple  
13 inhaled agents, especially if they have a recent history of COPD-related hospitalizations or ED  
14 visits. When patient severity was stratified by exacerbation rates, there was also a notable  
15 upward trend in the use of macrolide prophylaxis in the mild group. Although this may reflect  
16 indication creep, these patients may have also had outpatient exacerbations that were not  
17 captured in the study.  
18  
19  
20  
21  
22  
23  
24  
25  
26  
27  
28  
29  
30  
31  
32  
33  
34  
35  
36  
37  
38  
39

40 There was heterogeneity in the antibiotic regimens that patients received. The most common one  
41 was equivalent to a daily dose of <150 mg of azithromycin. This likely corresponds to the  
42 regimen of azithromycin 250 mg thrice weekly. Of note, this is a smaller dose compared to the  
43 250 mg daily regimen tested in the MACRO trial. This may be a deliberate choice by clinicians,  
44 possibly due to concerns regarding side effects and/or patient inconvenience. Certain  
45 commentators have argued that given the long half-life of azithromycin, daily dosing may in fact  
46 be too aggressive.<sup>25,26</sup> Respiriologists may also have more familiarity with thrice weekly  
47  
48  
49  
50  
51  
52  
53  
54  
55  
56  
57  
58  
59  
60

1  
2  
3 regimens since this approach is also routinely applied to patients with cystic fibrosis and other  
4  
5 causes of bronchiectasis.<sup>27,28</sup>  
6  
7  
8  
9

10 In terms of patient outcomes, the seasonal pattern of COPD-related healthcare visits remained  
11  
12 stable over the years and there was no appreciable reduction in COPD hospitalizations or ED  
13  
14 visits associated with the growth in macrolide use. We believe that this is primarily because the  
15  
16 overall use of prophylaxis remained low at the end of the study period (maximum 13.8/1000  
17  
18 COPD patients, 32.3/1000 severe COPD patients). Therefore, any benefits at the individual level  
19  
20 would not necessarily translate to measurable changes at the population level. Furthermore,  
21  
22 patient adherence was inferred from drug dispensing data, but true adherence is not known. In  
23  
24 addition, the MACRO trial's analysis of healthcare utilization only showed a significant  
25  
26 reduction in unscheduled office visits (an outcome that we were unable to measure in this study  
27  
28 due to database limitations), not hospitalizations or ED use.<sup>6</sup>  
29  
30  
31  
32  
33  
34

35 There were also no apparent changes in the overall pattern of possible COPD-related adverse  
36  
37 events over time. In the MACRO trial, there were no differences in the rate of serious adverse  
38  
39 events between the two arms of the study, but hearing decrements on audiometry testing were  
40  
41 more common in the azithromycin group. Our composite outcome also included other risks  
42  
43 associated with macrolides such as cardiac arrhythmias, allergic reactions, and diarrhea or *C.*  
44  
45 *difficile* colitis. However, there are limitations with how these events were captured in this study.  
46  
47 Because administrative databases were used, it is impossible to determine the proportion of  
48  
49 events that should be attributed to macrolide use. Additionally, some of the minor or more subtle  
50  
51 adverse effects (such as hearing loss) may not be recognized by patients or may not lead to  
52  
53  
54  
55  
56  
57  
58  
59  
60

1  
2  
3 healthcare encounters that would be captured in this study. Furthermore, the absence of  
4  
5 population-wide microbiology data during this study interval meant that we were unable to  
6  
7 examine for one of the most important potential patient- and societal-level harm of widespread  
8  
9 macrolide use, namely the selection of increased macrolide resistance in key human pathogens,  
10  
11 such as *Streptococcus pneumoniae*, *Streptococcus pyogenes*, and *Staphylococcus aureus*.  
12  
13  
14  
15  
16

### 17 Limitations

18  
19 There are other notable study limitations in addition to those mentioned previously. The COPD  
20  
21 cohort was identified using an ICES-derived definition. Although it has been previously  
22  
23 validated, its sensitivity and specificity are imperfect.<sup>18</sup> Because we used health administrative  
24  
25 data, we also did not have individual spirometry data to help classify the patients by severity  
26  
27 (other relevant variables such as smoking status were also not available). However, our method  
28  
29 of stratifying by baseline inhaler medications and exacerbation rates appear to be valid given the  
30  
31 clear delineation in trends in treatment and outcomes between the different groups. Although we  
32  
33 found that patient selection for prophylaxis generally conformed to clinical guidelines, we do not  
34  
35 have specific data to determine whether patients were also appropriately screened for  
36  
37 contraindications such as prolonged QT intervals and baseline hearing impairment.  
38  
39  
40  
41  
42  
43

### 44 Conclusion

45  
46 There has been a significant rise in the use of macrolides as prophylaxis for moderate to severe  
47  
48 COPD patients with recurrent exacerbations. The overall rate remains low, and so there has not  
49  
50 been a detectable impact on the trend of COPD-related healthcare encounters at a population  
51  
52 level. As this practice becomes increasingly common, it will be important to monitor its potential  
53  
54  
55  
56  
57  
58  
59  
60



1  
2  
3 benefits on COPD exacerbations but also its potential impact on adverse events and  
4  
5 antimicrobial resistance patterns.  
6  
7  
8  
9  
10  
11  
12  
13  
14  
15  
16  
17  
18  
19  
20  
21  
22  
23  
24  
25  
26  
27  
28  
29  
30  
31  
32  
33  
34  
35  
36  
37  
38  
39  
40  
41  
42  
43  
44  
45  
46  
47  
48  
49  
50  
51  
52  
53  
54  
55  
56  
57  
58  
59  
60

Confidential

1  
2  
3 ACKNOWLEDGMENTS  
4

5 This study was supported by ICES (formerly known as the Institute for Clinical Evaluative  
6 Sciences), which is funded by an annual grant from the Ontario Ministry of Health and Long-  
7 Term Care. Parts of this material are based on data and information compiled and provided by  
8 Ontario Ministry of Health and Long-Term Care, Cancer Care Ontario and Canadian Institute for  
9 Health Information. The analyses, conclusions, opinions and statements expressed herein are  
10 solely those of the authors and do not reflect those of the funding or data sources; no  
11 endorsement is intended or should be inferred. The authors thank IMS Brogan Inc. for the use of  
12 their Drug Information Database.  
13  
14  
15  
16  
17  
18  
19  
20  
21  
22  
23  
24  
25  
26  
27  
28  
29  
30  
31  
32  
33  
34  
35  
36  
37  
38  
39  
40  
41  
42  
43  
44  
45  
46  
47  
48  
49  
50  
51  
52  
53  
54  
55  
56  
57  
58  
59  
60

## REFERENCES

1. Global, regional, and national deaths, prevalence, disability-adjusted life years, and years lived with disability for chronic obstructive pulmonary disease and asthma, 1990–2015: a systematic analysis for the Global Burden of Disease Study 2015. *Lancet Respir Med*. 2017 Sep;5(9):691–706.
2. López-Campos JL, Tan W, Soriano JB. Global burden of COPD. *Respirology*. 2016 Jan;21(1):14–23.
3. Adeloye D, Chua S, Lee C, Basquill C, Papana A, Theodoratou E, Nair H, Gasevic D, Sridhar D, Campbell H, Chan KY, Sheikh A, Rudan I, Global Health Epidemiology Reference Group (GHERG). Global and regional estimates of COPD prevalence: Systematic review and meta-analysis. *J Glob Health*. 2015 Dec;5(2):020415.
4. Gold Reports [Internet]. Global Initiative for Chronic Obstructive Lung Disease - GOLD. [cited 2019 Oct 6]. Available from: <https://goldcopd.org/gold-reports/>
5. Pavord ID, Jones PW, Burgel P-R, Rabe KF. Exacerbations of COPD. *Int J Chron Obstruct Pulmon Dis*. 2016 Feb 19;11(Spec Iss):21–30.
6. Albert RK, Connett J, Bailey WC, Casaburi R, Cooper JAD, Criner GJ, Curtis JL, Dransfield MT, Han MK, Lazarus SC, Make B, Marchetti N, Martinez FJ, Madinger NE, McEvoy C, Niewoehner DE, Porsasz J, Price CS, Reilly J, Scanlon PD, Sciurba FC, Scharf SM, Washko GR, Woodruff PG, Anthonisen NR. Azithromycin for Prevention of Exacerbations of COPD. *N Engl J Med*. 2011 Aug 25;365(8):689–98.
7. Herath SC, Normansell R, Maisey S, Poole P. Prophylactic antibiotic therapy for chronic obstructive pulmonary disease (COPD). *Cochrane Database Syst Rev*. 2018 30;10:CD009764.

- 1  
2  
3 8. Yao GY, Ma YL, Zhang MQ, Gao ZC. Macrolide therapy decreases chronic obstructive  
4 pulmonary disease exacerbation: a meta-analysis. *Respiration*. 2013;86(3):254–60.  
5  
6
- 7  
8 9. Naderi N, Assayag D, Mostafavi-Pour-Manshadi SMY, Kaddaha Z, Joubert A, Ouellet I,  
9 Drouin I, Li PZ, Bourbeau J. Long-term azithromycin therapy to reduce acute exacerbations  
10 in patients with severe chronic obstructive pulmonary disease. *Respir Med*. 2018;138:129–  
11 36.  
12  
13
- 14  
15  
16  
17 10. Wang Y, Zijp TR, Bahar MA, Kocks JWH, Wilffert B, Hak E. Effects of prophylactic  
18 antibiotics on patients with stable COPD: a systematic review and meta-analysis of  
19 randomized controlled trials. *J Antimicrob Chemother*. 2018 01;73(12):3231–43.  
20  
21
- 22  
23  
24 11. Friedlander AL, Albert RK. Chronic macrolide therapy in inflammatory airways diseases.  
25 *Chest*. 2010 Nov;138(5):1202–12.  
26  
27
- 28  
29 12. Martinez FJ, Curtis JL, Albert R. Role of macrolide therapy in chronic obstructive  
30 pulmonary disease. *Int J Chron Obstruct Pulmon Dis*. 2008 Sep;3(3):331–50.  
31  
32
- 33  
34 13. Bourbeau J, Bhutani M, Hernandez P, Aaron SD, Balter M, Beauchesne M-F, D'Urzo A,  
35 Goldstein R, Kaplan A, Maltais F, Sin DD, Marciniuk DD. Canadian Thoracic Society  
36 Clinical Practice Guideline on pharmacotherapy in patients with COPD – 2019 update of  
37 evidence. *Can J Respir Crit Care Sleep Med*. 2019 Oct 18;0(0):1–23.  
38  
39
- 40  
41  
42 14. Wedzicha JA, Calverley PMA, Albert RK, Anzueto A, Criner GJ, Hurst JR, Miravittles M,  
43 Papi A, Rabe KF, Rigau D, Sliwinski P, Tonia T, Vestbo J, Wilson KC, Krishnan JA.  
44 Prevention of COPD exacerbations: a European Respiratory Society/American Thoracic  
45 Society guideline. *Eur Respir J*. 2017;50(3).  
46  
47  
48  
49  
50  
51  
52  
53  
54  
55  
56  
57  
58  
59  
60

- 1  
2  
3 15. Levy AR, O'Brien BJ, Sellors C, Grootendorst P, Willison D. Coding accuracy of  
4  
5 administrative drug claims in the Ontario Drug Benefit database. *Can J Clin Pharmacol.*  
6  
7 2003;10(2):67–71.  
8  
9
- 10 16. Juurlink D, Preyra C, Croxford R, Chong A, Austin P, Tu J, Laupacis A. Canadian Institute  
11  
12 for Health Information Discharge Abstract Database: A Validation Study. Toronto: Institute  
13  
14 for Clinical Evaluative Sciences; 2006.  
15  
16
- 17 17. Canadian Institute for Health Information, Canadian Health Information Management  
18  
19 Association. CIHI data quality study of Ontario emergency department visits for 2004-  
20  
21 2005: executive summary. [Internet]. Ottawa: Canadian Institute for Health Information;  
22  
23 2007 [cited 2019 Oct 6]. Available from:  
24  
25 [http://secure.cihi.ca/cihiweb/products/voll\\_nacrs\\_executive\\_summary\\_nov2\\_2007.pdf](http://secure.cihi.ca/cihiweb/products/voll_nacrs_executive_summary_nov2_2007.pdf)  
26  
27
- 28 18. Gershon AS, Wang C, Guan J, Vasilevska-Ristovska J, Cicutto L, To T. Identifying  
29  
30 individuals with physician diagnosed COPD in health administrative databases. *COPD.*  
31  
32 2009 Oct;6(5):388–94.  
33  
34
- 35 19. Gershon AS, Wang C, Guan J, Vasilevska-Ristovska J, Cicutto L, To T. Identifying  
36  
37 patients with physician-diagnosed asthma in health administrative databases. *Can Respir J.*  
38  
39 2009 Dec;16(6):183–8.  
40  
41
- 42 20. Schultz SE, Rothwell DM, Chen Z, Tu K. Identifying cases of congestive heart failure from  
43  
44 administrative data: a validation study using primary care patient records. *Chronic Dis Inj*  
45  
46 *Can.* 2013 Jun;33(3):160–6.  
47  
48
- 49 21. Bernal JL, Cummins S, Gasparrini A. Interrupted time series regression for the evaluation  
50  
51 of public health interventions: a tutorial. *Int J Epidemiol.* 2017 01;46(1):348–55.  
52  
53  
54  
55  
56  
57  
58  
59  
60

- 1  
2  
3  
4  
5  
6  
7  
8  
9  
10  
11  
12  
13  
14  
15  
16  
17  
18  
19  
20  
21  
22  
23  
24  
25  
26  
27  
28  
29  
30  
31  
32  
33  
34  
35  
36  
37  
38  
39  
40  
41  
42  
43  
44  
45  
46  
47  
48  
49  
50  
51  
52  
53  
54  
55  
56  
57  
58  
59  
60
22. Seemungal TAR, Wilkinson TMA, Hurst JR, Perera WR, Sapsford RJ, Wedzicha JA. Long-term erythromycin therapy is associated with decreased chronic obstructive pulmonary disease exacerbations. *Am J Respir Crit Care Med.* 2008 Dec 1;178(11):1139–47.
23. James GDR, Petersen I, Nazareth I, Wedzicha JA, Donaldson GC. Use of long-term antibiotic treatment in COPD patients in the UK: a retrospective cohort study. *Prim Care Respir J.* 2013 Sep;22(3):271–7.
24. Criner GJ, Bourbeau J, Diekemper RL, Ouellette DR, Goodridge D, Hernandez P, Curren K, Balter MS, Bhutani M, Camp PG, Celli BR, Dechman G, Dransfield MT, Fiel SB, Foreman MG, Hanania NA, Ireland BK, Marchetti N, Marciniuk DD, Mularski RA, Ornelas J, Road JD, Stickland MK. Prevention of acute exacerbations of COPD: American College of Chest Physicians and Canadian Thoracic Society Guideline. *Chest.* 2015 Apr;147(4):894–942.
25. Wenzel RP, Fowler AA, Edmond MB. Antibiotic Prevention of Acute Exacerbations of COPD. *N Engl J Med.* 2012 Jul 26;367(4):340–7.
26. Peters J, Anzueto A. Azithromycin once daily for 1 year reduced acute COPD exacerbations. *Ann Intern Med.* 2012 Jan 17;156(2):JC1-10.
27. Polverino E, Goeminne PC, McDonnell MJ, Aliberti S, Marshall SE, Loebinger MR, Murriss M, Cantón R, Torres A, Dimakou K, Soyza AD, Hill AT, Haworth CS, Vendrell M, Ringshausen FC, Subotic D, Wilson R, Vilaró J, Stallberg B, Welte T, Rohde G, Blasi F, Elborn S, Almagro M, Timothy A, Ruddy T, Tonia T, Rigau D, Chalmers JD. European Respiratory Society guidelines for the management of adult bronchiectasis. *Eur Respir J.* 2017 Sep 1;50(3):1700629.

- 1  
2  
3 28. Mogayzel PJ, Naureckas ET, Robinson KA, Mueller G, Hadjiliadis D, Hoag JB, Lubsch L,  
4 Hazle L, Sabadosa K, Marshall B. Cystic Fibrosis Pulmonary Guidelines. Am J Respir Crit  
5 Care Med. 2013 Mar 27;187(7):680–9.  
6  
7  
8  
9  
10  
11  
12  
13  
14  
15  
16  
17  
18  
19  
20  
21  
22  
23  
24  
25  
26  
27  
28  
29  
30  
31  
32  
33  
34  
35  
36  
37  
38  
39  
40  
41  
42  
43  
44  
45  
46  
47  
48  
49  
50  
51  
52  
53  
54  
55  
56  
57  
58  
59  
60

Confidential

1  
2  
3 TABLES  
4  
5

6 **Table 1. Baseline characteristics of patients pre- and post-Q3-2011.**  
7

| 8 <b>Characteristics</b>        | <b>Pre-Q3-2011</b> | <b>Post-Q3-2011</b> |
|---------------------------------|--------------------|---------------------|
|                                 | <b>N=254,457*</b>  | <b>N=312,370*</b>   |
| 12 <b>Demographics</b>          |                    |                     |
| 14 <b>Sex</b>                   |                    |                     |
| 15                              |                    |                     |
| 16                              |                    |                     |
| 17 Female                       | 132,279 (52.0%)    | 162,602 (52.1%)     |
| 18                              |                    |                     |
| 19 Male                         | 122,178 (48.0%)    | 149,768 (47.9%)     |
| 20                              |                    |                     |
| 21 <b>Age at index</b>          |                    |                     |
| 22                              |                    |                     |
| 23                              |                    |                     |
| 24 Mean $\pm$ SD                | 76.42 $\pm$ 7.64   | 76.37 $\pm$ 8.13    |
| 25                              |                    |                     |
| 26 Median (IQR)                 | 76 (70-82)         | 75 (69-82)          |
| 27                              |                    |                     |
| 28 <b>Age at COPD diagnosis</b> |                    |                     |
| 29                              |                    |                     |
| 30                              |                    |                     |
| 31 Mean $\pm$ SD                | 68.73 $\pm$ 9.34   | 66.53 $\pm$ 10.73   |
| 32                              |                    |                     |
| 33 Median (IQR)                 | 68 (62-75)         | 66 (59-74)          |
| 34                              |                    |                     |
| 35 <b>Income quintile</b>       |                    |                     |
| 36                              |                    |                     |
| 37                              |                    |                     |
| 38 Missing                      | 1,232 (0.5%)       | 967 (0.3%)          |
| 39                              |                    |                     |
| 40 1 (lowest)                   | 61,399 (24.1%)     | 78,962 (25.3%)      |
| 41                              |                    |                     |
| 42 2                            | 55,665 (21.9%)     | 69,872 (22.4%)      |
| 43                              |                    |                     |
| 44 3                            | 49,324 (19.4%)     | 61,227 (19.6%)      |
| 45                              |                    |                     |
| 46 4                            | 45,992 (18.1%)     | 53,434 (17.1%)      |
| 47                              |                    |                     |
| 48 5 (highest)                  | 40,845 (16.1%)     | 47,908 (15.3%)      |
| 49                              |                    |                     |
| 50 <b>Rural†</b>                |                    |                     |
| 51                              |                    |                     |
| 52                              |                    |                     |
| 53 Missing                      | 287 (0.1%)         | 374 (0.1%)          |
| 54                              |                    |                     |
| 55                              |                    |                     |
| 56                              |                    |                     |
| 57                              |                    |                     |
| 58                              |                    |                     |
| 59                              |                    |                     |
| 60                              |                    |                     |



1  
2  
3  
4  
5  
6  
7  
8  
9  
10  
11  
12  
13  
14  
15  
16  
17  
18  
19  
20  
21  
22  
23  
24  
25  
26  
27  
28  
29  
30  
31  
32  
33  
34  
35  
36  
37  
38  
39  
40  
41  
42  
43  
44  
45  
46  
47  
48  
49  
50  
51  
52  
53  
54  
55  
56  
57  
58  
59  
60

|                                                  |                 |                 |
|--------------------------------------------------|-----------------|-----------------|
| No                                               | 211,047 (82.9%) | 261,532 (83.7%) |
| Yes                                              | 43,123 (16.9%)  | 50,464 (16.2%)  |
| <b>Comorbidities</b>                             |                 |                 |
| Asthma                                           | 96,907 (38.1%)  | 107,543 (34.4%) |
| Congestive heart failure                         | 70,177 (27.6%)  | 78,542 (25.1%)  |
| Ischemic heart disease (preceding 2 years)       | 35,404 (13.9%)  | 34,650 (11.1%)  |
| Pneumonia (preceding 2 years)                    | 69,587 (27.3%)  | 78,700 (25.2%)  |
| <b>Healthcare utilization</b>                    |                 |                 |
| Hospitalizations per year‡                       |                 |                 |
| Mean ± SD                                        | 0.42 ± 0.69     | 0.37 ± 0.67     |
| ED visits per year‡                              |                 |                 |
| Mean ± SD                                        | 0.77 ± 1.54     | 0.83 ± 1.56     |
| <b>Medication use</b>                            |                 |                 |
| Corticosteroid days per year‡                    |                 |                 |
| Mean ± SD                                        | 12.92 ± 51.62   | 11.12 ± 47.22   |
| High-dose corticosteroid days per year‡          |                 |                 |
| Mean ± SD                                        | 1.01 ± 4.95     | 1.26 ± 5.15     |
| Any oral steroid in previous 2 years             |                 |                 |
|                                                  | 70,570 (27.7%)  | 96,733 (31.0%)  |
| Number of long-acting inhaled agents at baseline |                 |                 |
| 1                                                | 140,977 (55.4%) | 140,905 (45.1%) |
| 2                                                | 76,832 (30.2%)  | 111,904 (35.8%) |
| 3                                                | 36,648 (14.4%)  | 59,561 (19.1%)  |
| <b>Inhaled therapy types</b>                     |                 |                 |

|                     |                |                |
|---------------------|----------------|----------------|
| LAMA only           | 73,406 (28.8%) | 90,693 (29.0%) |
| ICS only            | 64,056 (25.2%) | 48,270 (15.5%) |
| LABA only           | 3,515 (1.4%)   | 1,942 (0.6%)   |
| LABA + ICS          | 66,114 (26.0%) | 94,058 (30.1%) |
| LAMA + LABA         | 2,157 (0.8%)   | 11,697 (3.7%)  |
| LAMA + ICS          | 8,561 (3.4%)   | 6,149 (2.0%)   |
| LAMA + LABA + ICS   | 36,648 (14.4%) | 59,561 (19.1%) |
| Supplemental oxygen | 17,841 (7.0%)  | 27,679 (8.9%)  |

---

SD = standard deviation; IQR = interquartile range; ICS = inhaled corticosteroid; LAMA = long-acting muscarinic antagonist; LABA = long-acting beta agonist.

\*There were 132,701 individuals eligible in both eras.

†Rurality had 0.1% missing for each era.

‡Based on the preceding two years.

1  
2  
3 FIGURE LEGENDS  
4

5 **Figure 1.** Increase in the prevalence of chronic macrolide therapy among COPD patients over  
6 time, as compared to trends in chronic prophylaxis with other common antimicrobial agents.  
7

8  
9  
10 **Figure 2.** Prevalence of long-term macrolide therapy among COPD patients over time, stratified  
11 by a) therapy-based severity and b) exacerbation-based severity.  
12  
13

14 **Figure 3.** Interrupted time series analysis demonstrating increase in long-term macrolide therapy  
15 associated with publication of seminal randomized controlled trial demonstrating efficacy of  
16 azithromycin for prevention of exacerbations in 2011.<sup>6</sup> RCT = randomized controlled trial.  
17  
18

19  
20  
21 **Figure 4.** Overall temporal trends in COPD-related clinical outcomes. ED = emergency  
22 department.  
23  
24

25  
26 **Figure 5.** Temporal trends in COPD-related clinical outcomes among patients with severe  
27 COPD (severity defined by intensity of inhaled therapy). ED = emergency department.  
28  
29  
30  
31  
32  
33  
34  
35  
36  
37  
38  
39  
40  
41  
42  
43  
44  
45  
46  
47  
48  
49  
50  
51  
52  
53  
54  
55  
56  
57  
58  
59  
60

1  
2  
3  
4  
5  
6  
7  
8  
9  
10  
11  
12  
13  
14  
15  
16  
17  
18  
19  
20  
21  
22  
23  
24  
25  
26  
27  
28  
29  
30  
31  
32  
33  
34  
35  
36  
37  
38  
39  
40  
41  
42  
43  
44  
45  
46  
47  
48  
49  
50  
51  
52  
53  
54  
55  
56  
57  
58  
59  
60

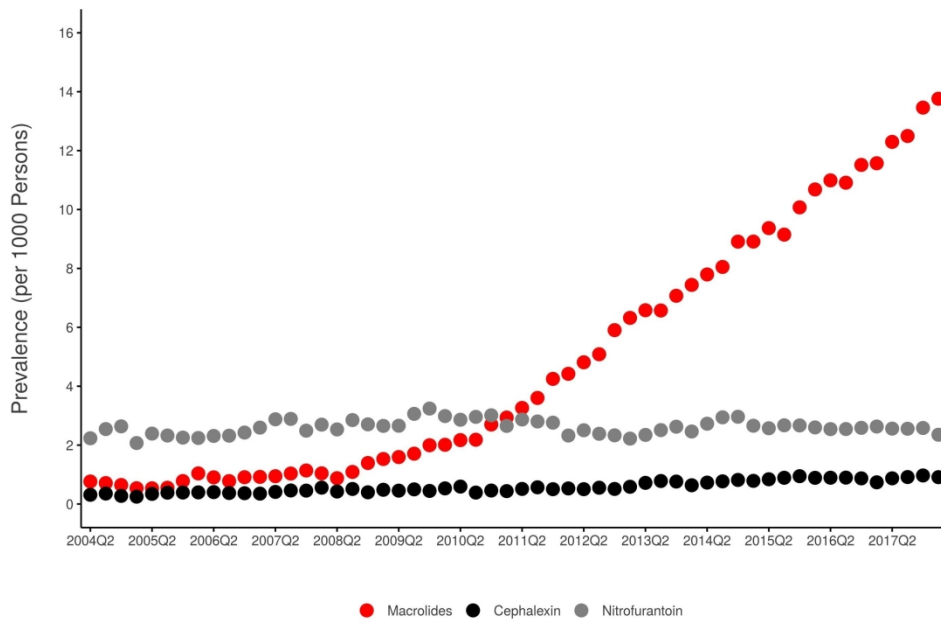

Figure 1. Increase in the prevalence of chronic macrolide therapy among COPD patients over time, as compared to trends in chronic prophylaxis with other common antimicrobial agents.

781x518mm (96 x 96 DPI)

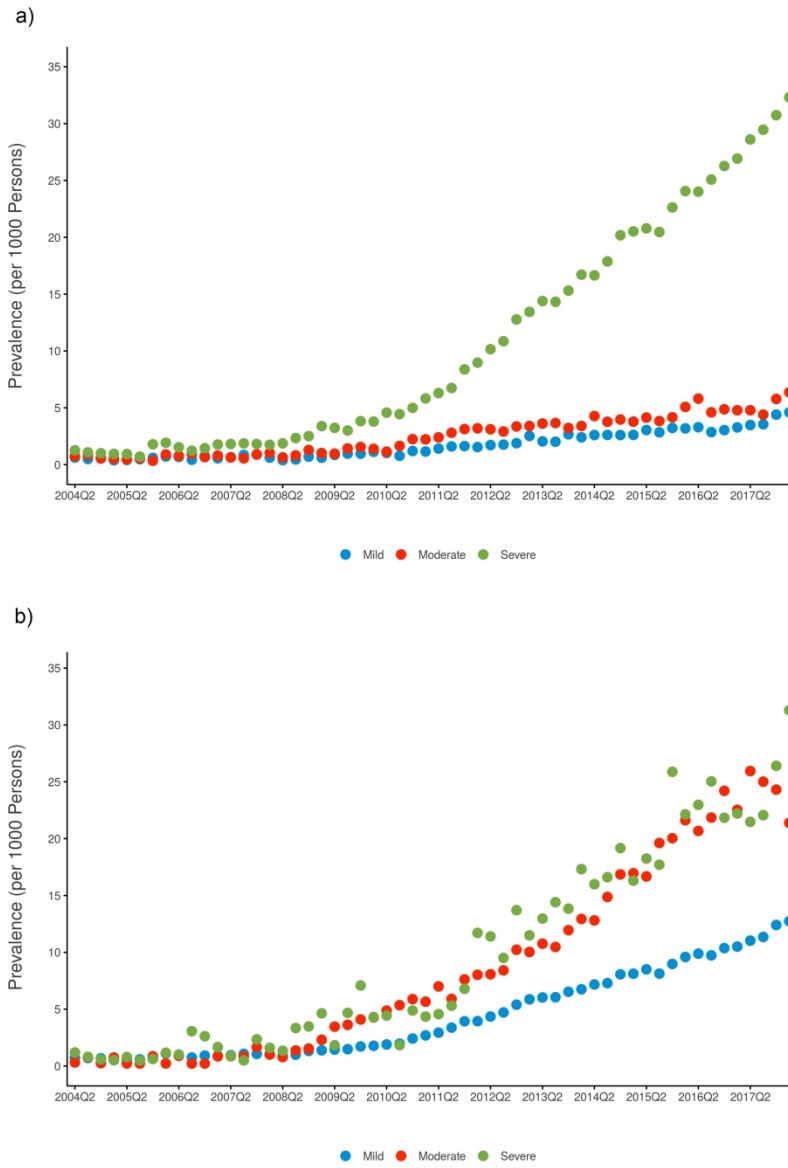

Figure 2. Prevalence of long-term macrolide therapy among COPD patients over time, stratified by a) therapy-based severity and b) exacerbation-based severity.

251x355mm (300 x 300 DPI)

1  
2  
3  
4  
5  
6  
7  
8  
9  
10  
11  
12  
13  
14  
15  
16  
17  
18  
19  
20  
21  
22  
23  
24  
25  
26  
27  
28  
29  
30  
31  
32  
33  
34  
35  
36  
37  
38  
39  
40  
41  
42  
43  
44  
45  
46  
47  
48  
49  
50  
51  
52  
53  
54  
55  
56  
57  
58  
59  
60

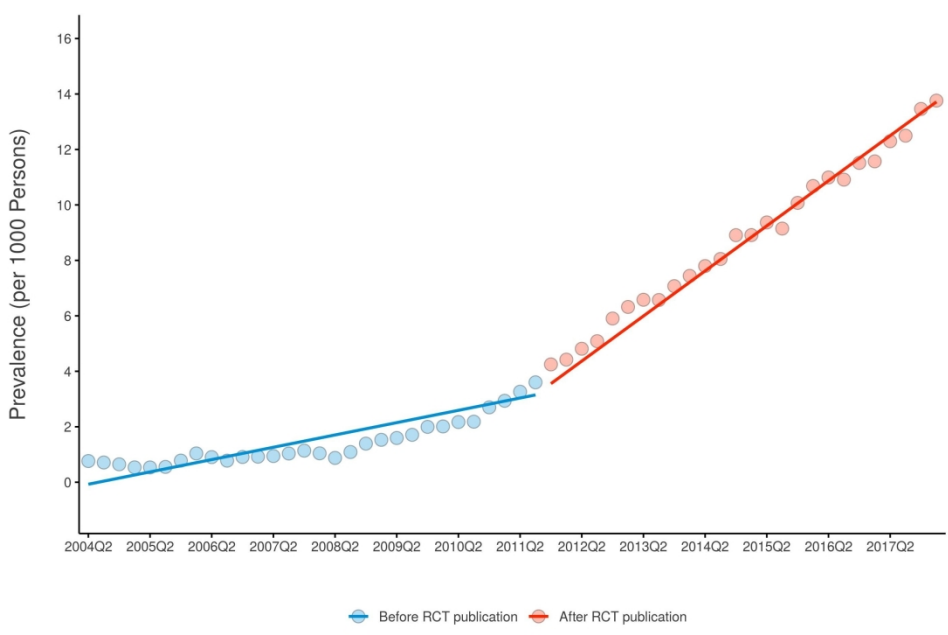

Figure 3. Interrupted time series analysis demonstrating increase in long-term macrolide therapy associated with publication of seminal randomized controlled trial demonstrating efficacy of azithromycin for prevention of exacerbations in 2011.6 RCT = randomized controlled trial.

781x519mm (96 x 96 DPI)

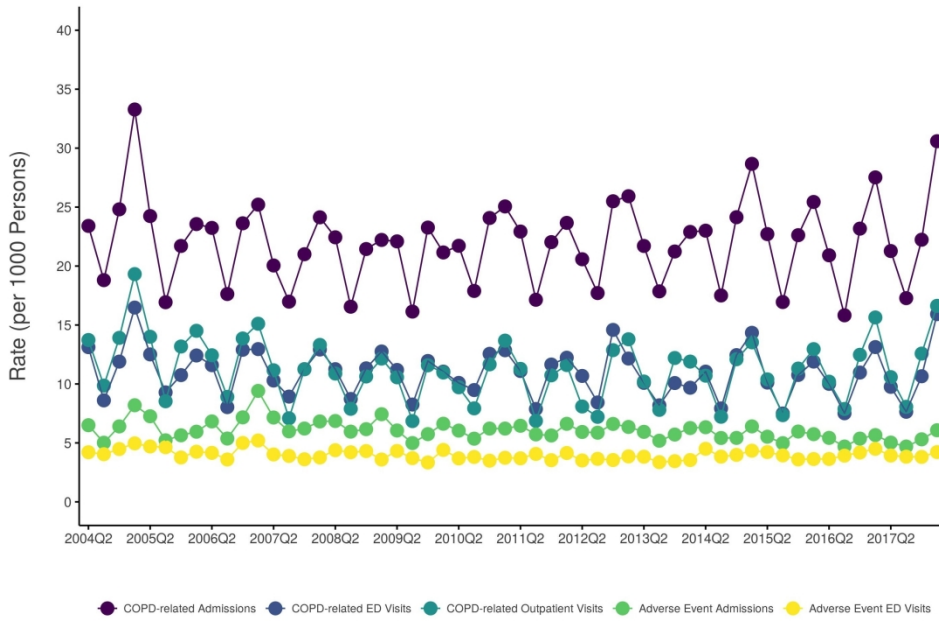

Figure 4. Overall temporal trends in COPD-related clinical outcomes. ED = emergency department.

780x519mm (96 x 96 DPI)

1  
2  
3  
4  
5  
6  
7  
8  
9  
10  
11  
12  
13  
14  
15  
16  
17  
18  
19  
20  
21  
22  
23  
24  
25  
26  
27  
28  
29  
30  
31  
32  
33  
34  
35  
36  
37  
38  
39  
40  
41  
42  
43  
44  
45  
46  
47  
48  
49  
50  
51  
52  
53  
54  
55  
56  
57  
58  
59  
60

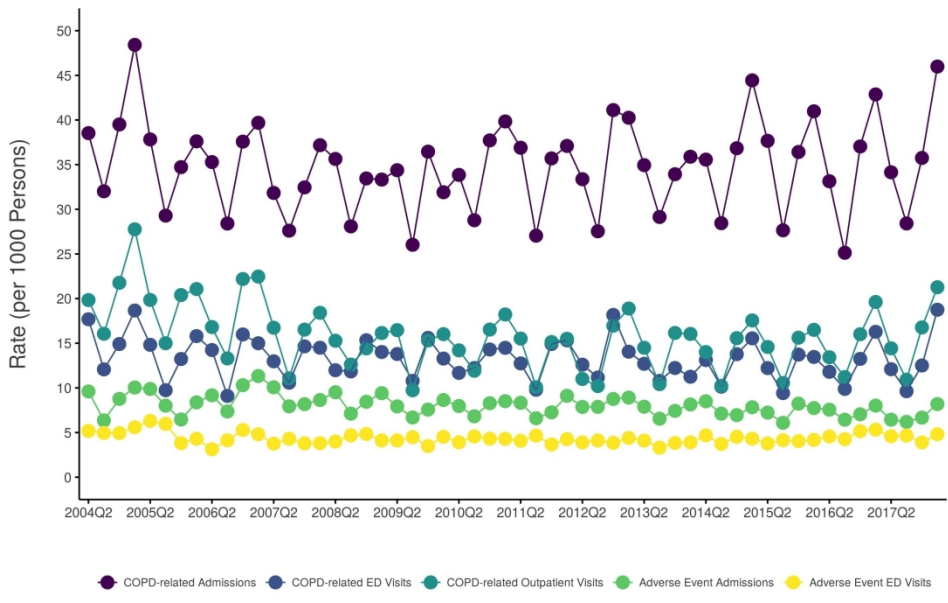

Figure 5. Temporal trends in COPD-related clinical outcomes among patients with severe COPD (severity defined by intensity of inhaled therapy). ED = emergency department.

780x484mm (96 x 96 DPI)



Appendix

**Long-Term Macrolide Therapy for Chronic Obstructive Pulmonary Disease: A  
Population-Based Study**

Marie Yan, Farah E. Saxena, Andrew Calzavara, Kevin A. Brown, Gary Garber, Andrea S.  
Gershon, Jennie Johnstone, Matthew Kumar, Bradley J. Langford, Kevin L. Schwartz, and Nick  
Daneman

Confidential

### Data Sources

The Ontario Health Insurance Plan is publicly funded and covers all medically necessary services for residents of the province. The Ontario Drug Benefit program covers prescription medications (including respiratory inhalers) for patients aged 65 and over, and this database has an accuracy exceeding 99% for drugs dispensed by Ontario pharmacies.<sup>1</sup> Four other administrative databases were used for information on demographics, supplemental oxygen use, hospitalizations and emergency department visits. The Registered Persons Database includes patient demographics, such as age, sex, neighbourhood, income quintile and rurality. Information on supplemental oxygen use was obtained from the provincial Assistive Devices Program. The Discharge Abstract Database contains individual-level data for acute, rehabilitation, chronic and day surgery institutions in Ontario.<sup>2</sup> The National Ambulatory Care Reporting System includes patient visits to hospital and community-based ambulatory care (i.e., day surgery, outpatient clinics, and emergency department visits).<sup>3</sup>

**Table S1.** International Classification of Diseases Tenth Revision (ICD-10) codes used for each exclusion criterion, comorbidity, or potential adverse event examined in the study.

| Condition                                                                                    | ICD-10 Codes                                                  |
|----------------------------------------------------------------------------------------------|---------------------------------------------------------------|
| Infection due to other mycobacteria                                                          | A31                                                           |
| Bronchiectasis                                                                               | J47                                                           |
| Ischemic heart disease                                                                       | I20–I25                                                       |
| Pneumonia                                                                                    | J10.0, J11.0, J12–J18                                         |
| Arrhythmias potentially related to macrolide-induced QT prolongation including cardiac death | I46, I49.0, I49.8, I49.9                                      |
| Hearing impairment                                                                           | H90.3, H90.4, H90.5, H90.6, H90.7, H90.8, H91.0, H91.8, H91.9 |
| General adverse medication events and drug allergy                                           | Y40.3, T88.6, T88.7                                           |
| Antibiotic-resistant organisms                                                               | U88, U89                                                      |
| <i>Clostridioides difficile</i> colitis and non-infectious diarrhea                          | A04.7, K52.9                                                  |
| Candidiasis                                                                                  | B37                                                           |

**Figure S1.** Study flow chart.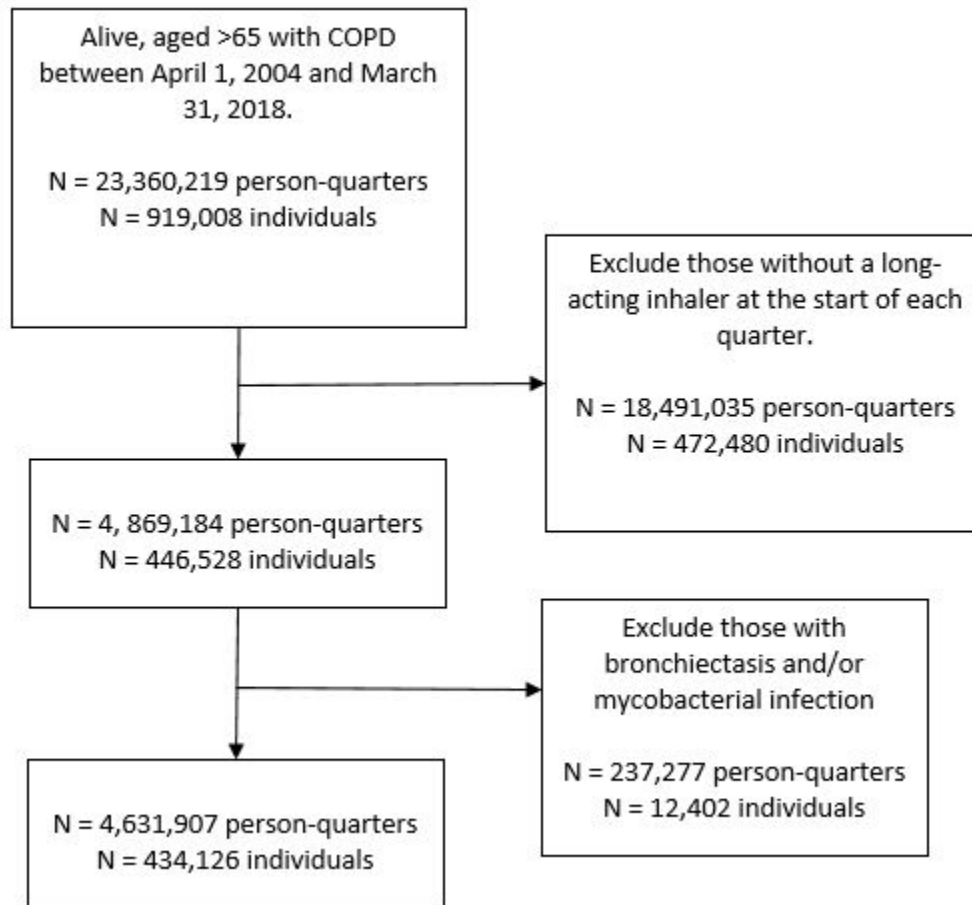

1  
2  
3 REFERENCES  
4

- 5  
6 1. Levy AR, O'Brien BJ, Sellors C, Grootendorst P, Willison D. Coding accuracy of  
7  
8 administrative drug claims in the Ontario Drug Benefit database. *Can J Clin Pharmacol*.  
9  
10 2003;10(2):67–71.  
11
- 12 2. Juurlink D, Preyra C, Croxford R, Chong A, Austin P, Tu J, Laupacis A. Canadian Institute  
13  
14 for Health Information Discharge Abstract Database: A Validation Study. Toronto: Institute  
15  
16 for Clinical Evaluative Sciences; 2006.  
17  
18
- 19 3. Canadian Institute for Health Information, Canadian Health Information Management  
20  
21 Association. CIHI data quality study of Ontario emergency department visits for 2004-2005:  
22  
23 executive summary. [Internet]. Ottawa: Canadian Institute for Health Information; 2007  
24  
25 [cited 2019 Oct 6]. Available from:  
26  
27 [http://secure.cihi.ca/cihiweb/products/vol1\\_nacrs\\_executive\\_summary\\_nov2\\_2007.pdf](http://secure.cihi.ca/cihiweb/products/vol1_nacrs_executive_summary_nov2_2007.pdf)  
28  
29  
30  
31  
32  
33  
34  
35  
36  
37  
38  
39  
40  
41  
42  
43  
44  
45  
46  
47  
48  
49  
50  
51  
52  
53  
54  
55  
56  
57  
58  
59  
60

## STROBE Statement—checklist of items that should be included in reports of observational studies

|                              | Item No | Recommendation                                                                                                                                                                                                                                                                                                                                                                                                                                                         | Page No |
|------------------------------|---------|------------------------------------------------------------------------------------------------------------------------------------------------------------------------------------------------------------------------------------------------------------------------------------------------------------------------------------------------------------------------------------------------------------------------------------------------------------------------|---------|
| <b>Title and abstract</b>    | 1       | (a) Indicate the study's design with a commonly used term in the title or the abstract                                                                                                                                                                                                                                                                                                                                                                                 | 1, 3    |
|                              |         | (b) Provide in the abstract an informative and balanced summary of what was done and what was found                                                                                                                                                                                                                                                                                                                                                                    | 3       |
| <b>Introduction</b>          |         |                                                                                                                                                                                                                                                                                                                                                                                                                                                                        |         |
| Background/rationale         | 2       | Explain the scientific background and rationale for the investigation being reported                                                                                                                                                                                                                                                                                                                                                                                   | 5       |
| Objectives                   | 3       | State specific objectives, including any prespecified hypotheses                                                                                                                                                                                                                                                                                                                                                                                                       | 5       |
| <b>Methods</b>               |         |                                                                                                                                                                                                                                                                                                                                                                                                                                                                        |         |
| Study design                 | 4       | Present key elements of study design early in the paper                                                                                                                                                                                                                                                                                                                                                                                                                | 6       |
| Setting                      | 5       | Describe the setting, locations, and relevant dates, including periods of recruitment, exposure, follow-up, and data collection                                                                                                                                                                                                                                                                                                                                        | 6       |
| Participants                 | 6       | (a) <i>Cohort study</i> —Give the eligibility criteria, and the sources and methods of selection of participants. Describe methods of follow-up<br><i>Case-control study</i> —Give the eligibility criteria, and the sources and methods of case ascertainment and control selection. Give the rationale for the choice of cases and controls<br><i>Cross-sectional study</i> —Give the eligibility criteria, and the sources and methods of selection of participants | 6, 7    |
|                              |         | (b) <i>Cohort study</i> —For matched studies, give matching criteria and number of exposed and unexposed<br><i>Case-control study</i> —For matched studies, give matching criteria and the number of controls per case                                                                                                                                                                                                                                                 | N/A     |
| Variables                    | 7       | Clearly define all outcomes, exposures, predictors, potential confounders, and effect modifiers. Give diagnostic criteria, if applicable                                                                                                                                                                                                                                                                                                                               | 7, 8    |
| Data sources/<br>measurement | 8*      | For each variable of interest, give sources of data and details of methods of assessment (measurement). Describe comparability of assessment methods if there is more than one group                                                                                                                                                                                                                                                                                   | 6       |
| Bias                         | 9       | Describe any efforts to address potential sources of bias                                                                                                                                                                                                                                                                                                                                                                                                              | 9       |
| Study size                   | 10      | Explain how the study size was arrived at                                                                                                                                                                                                                                                                                                                                                                                                                              | N/A     |
| Quantitative variables       | 11      | Explain how quantitative variables were handled in the analyses. If applicable, describe which groupings were chosen and why                                                                                                                                                                                                                                                                                                                                           | 9       |
| Statistical methods          | 12      | (a) Describe all statistical methods, including those used to control for confounding                                                                                                                                                                                                                                                                                                                                                                                  | 9       |
|                              |         | (b) Describe any methods used to examine subgroups and interactions                                                                                                                                                                                                                                                                                                                                                                                                    | 9       |
|                              |         | (c) Explain how missing data were addressed                                                                                                                                                                                                                                                                                                                                                                                                                            | N/A     |
|                              |         | (d) <i>Cohort study</i> —If applicable, explain how loss to follow-up was addressed<br><i>Case-control study</i> —If applicable, explain how matching of cases and controls was addressed<br><i>Cross-sectional study</i> —If applicable, describe analytical methods taking account of sampling strategy                                                                                                                                                              | N/A     |
|                              |         | (e) Describe any sensitivity analyses                                                                                                                                                                                                                                                                                                                                                                                                                                  | N/A     |

Continued on next page

| <b>Results</b>           |     |                                                                                                                                                                                                                                                                                   |          |
|--------------------------|-----|-----------------------------------------------------------------------------------------------------------------------------------------------------------------------------------------------------------------------------------------------------------------------------------|----------|
| Participants             | 13* | (a) Report numbers of individuals at each stage of study—eg numbers potentially eligible, examined for eligibility, confirmed eligible, included in the study, completing follow-up, and analysed                                                                                 | Appendix |
|                          |     | (b) Give reasons for non-participation at each stage                                                                                                                                                                                                                              | N/A      |
|                          |     | (c) Consider use of a flow diagram                                                                                                                                                                                                                                                | Appendix |
| Descriptive data         | 14* | (a) Give characteristics of study participants (eg demographic, clinical, social) and information on exposures and potential confounders                                                                                                                                          | Table 1  |
|                          |     | (b) Indicate number of participants with missing data for each variable of interest                                                                                                                                                                                               | Table 1  |
|                          |     | (c) <i>Cohort study</i> —Summarise follow-up time (eg, average and total amount)                                                                                                                                                                                                  | N/A      |
| Outcome data             | 15* | <i>Cohort study</i> —Report numbers of outcome events or summary measures over time<br><i>Case-control study</i> —Report numbers in each exposure category, or summary measures of exposure<br><i>Cross-sectional study</i> —Report numbers of outcome events or summary measures | Figure 1 |
| Main results             | 16  | (a) Give unadjusted estimates and, if applicable, confounder-adjusted estimates and their precision (eg, 95% confidence interval). Make clear which confounders were adjusted for and why they were included                                                                      | 10       |
|                          |     | (b) Report category boundaries when continuous variables were categorized                                                                                                                                                                                                         | N/A      |
|                          |     | (c) If relevant, consider translating estimates of relative risk into absolute risk for a meaningful time period                                                                                                                                                                  | N/A      |
| Other analyses           | 17  | Report other analyses done—eg analyses of subgroups and interactions, and sensitivity analyses                                                                                                                                                                                    | 10       |
| <b>Discussion</b>        |     |                                                                                                                                                                                                                                                                                   |          |
| Key results              | 18  | Summarise key results with reference to study objectives                                                                                                                                                                                                                          | 11       |
| Limitations              | 19  | Discuss limitations of the study, taking into account sources of potential bias or imprecision. Discuss both direction and magnitude of any potential bias                                                                                                                        | 14       |
| Interpretation           | 20  | Give a cautious overall interpretation of results considering objectives, limitations, multiplicity of analyses, results from similar studies, and other relevant evidence                                                                                                        | 11–14    |
| Generalisability         | 21  | Discuss the generalisability (external validity) of the study results                                                                                                                                                                                                             | N/A      |
| <b>Other information</b> |     |                                                                                                                                                                                                                                                                                   |          |
| Funding                  | 22  | Give the source of funding and the role of the funders for the present study and, if applicable, for the original study on which the present article is based                                                                                                                     | 2        |

\*Give information separately for cases and controls in case-control studies and, if applicable, for exposed and unexposed groups in cohort and cross-sectional studies.

**Note:** An Explanation and Elaboration article discusses each checklist item and gives methodological background and published examples of transparent reporting. The STROBE checklist is best used in conjunction with this article (freely available on the Web sites of PLoS Medicine at <http://www.plosmedicine.org/>, Annals of Internal Medicine at <http://www.annals.org/>, and Epidemiology at <http://www.epidem.com/>). Information on the STROBE Initiative is available at [www.strobe-statement.org](http://www.strobe-statement.org).
